# Supplementary material
Source: publisher figshare collection journal article supplement (https://acs.figshare.com/ndownloader/files/4676116)
Supplement: Supplementary file 1 [file 4676116]

**Supporting Information for**

**Chiral Molecular Ferromagnets Based on Copper(II)**

**Polymers with End-On Azido Bridges**

Zhi-Guo Gu, You Song, Jing-Lin Zuo\*, and Xiao-Zeng You

*Coordination Chemistry Institute and the State Key Laboratory of Coordination  
Chemistry, Nanjing University, Nanjing 210093, China*

| <i><b>Index</b></i>                                                                                                                                            | Page |
|----------------------------------------------------------------------------------------------------------------------------------------------------------------|------|
| Figure S1. Structural model for <b>1</b> involving organic molecules separating the copper-azido layers.                                                       | S2   |
| Figure S2. $1/\chi_M$ versus $T$ in an applied field of 2 kOe for <b>1</b> .                                                                                   | S2   |
| Figure S3. Magnetization versus field up to $H = 70$ kOe at 1.8 K for <b>1</b> . The insert shows the hysteresis loop in the $\pm 2$ kOe range at $T = 1.8$ K. | S3   |
| Magnetic susceptibility data simulation for <b>1</b>                                                                                                           | S3   |

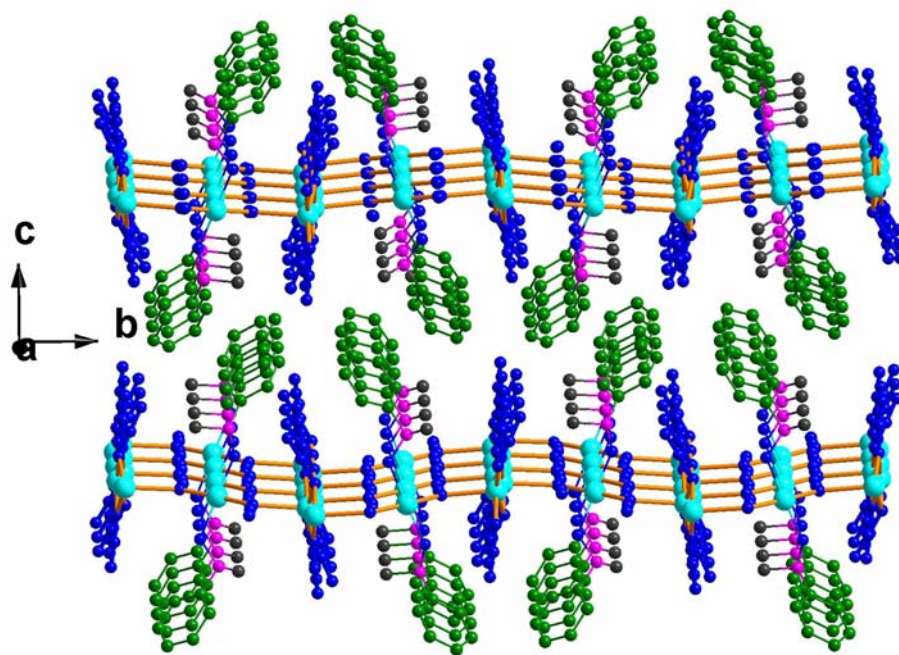

**Figure S1.** Structural model for **1** involving organic molecules separating the copper-azido layers. Color coding: Cu (light blue), N (blue), C (black, green, purple).

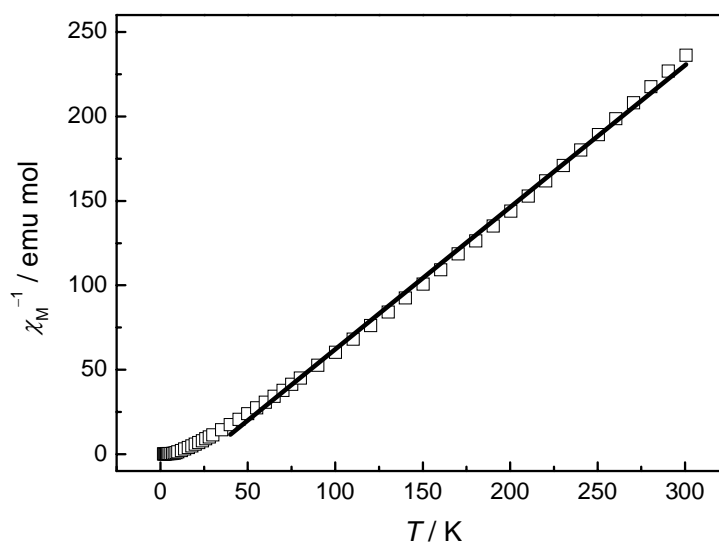

**Figure S2.**  $1/\chi_M$  versus  $T$  in an applied field of 2 kOe for **1**. The solid line is the best fit to the Curie–Weiss law.

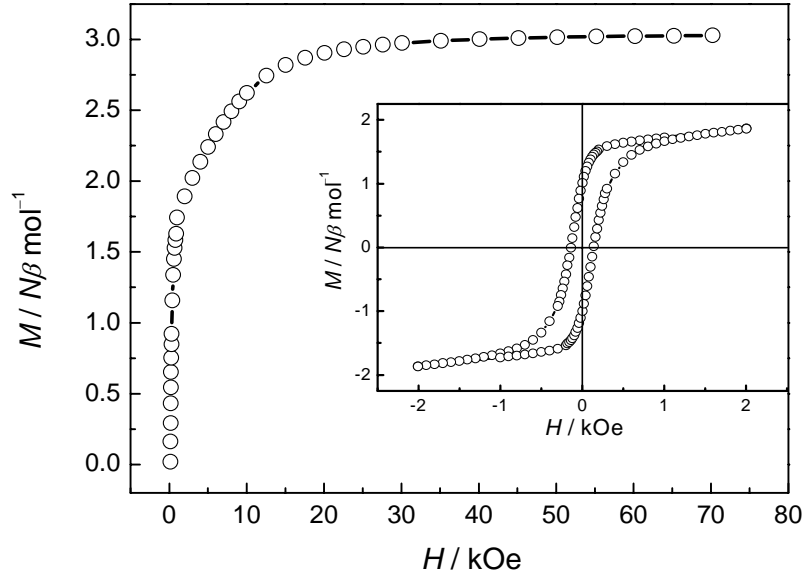

**Figure S3.** Magnetization versus field up to  $H = 70$  kOe at 1.8 K for **1**. The insert shows the hysteresis loop in the  $\pm 2$  kOe range at  $T = 1.8$  K.

Magnetic susceptibility data simulation for **1**:

For the two-dimensional complex based on interacting chains, the Hamiltonian is:

$$\hat{H}_{chain} = -J \sum_{i=1}^{n-1} \hat{S}_{A_i} \hat{S}_{A_{i+1}}$$

$$\hat{H} = -J \sum_{i=1}^{n-1} \hat{S}_{A_i} \hat{S}_{A_{i+1}} - zJ' \hat{S}_{chain} \hat{S}_{Cu}$$

Van Vleck equation:

$$\chi_{chain} = \frac{Ng^2\beta^2}{4kT} \left[ \frac{N}{D} \right]^{2/3} \quad (1)$$

$$N = 1.0 + 5.79799y + 16.90265y^2 + 29.37688y^3 + 29.83295y^4 + 14.03691y^5$$

$$D = 1.0 + 2.79799y + 7.00867y^2 + 8.65386y^3 + 4.57431y^4 \text{ and } y = J/2kT$$

$$\chi = \chi_{chain} + 0.5\chi_{Cu} \quad (2)$$

$$\chi_m = \frac{\chi}{1 - \chi(2zJ'/Ng^2\beta^2)} \quad (3)$$
